# Supplementary material for: Epigenetic age acceleration is associated with oligodendrocyte proportions in MSA and control brain tissue
Source: PubMed Central journal article supplement (PMC10107510; doi:10.1111/nan.12872), 2023-01-11
Supplement: NAN-49-0-s001.pdf [file NAN-49-0-s001.pdf]

# **Epigenetic age acceleration is associated with oligodendrocyte proportions in MSA and control brain tissue**

**Megha Murthy<sup>1,2</sup>, Gemma Shireby<sup>3</sup>, Yasuo Miki<sup>1,4</sup>, Emmanuelle Viré<sup>5</sup>, Tammaryn Lashley<sup>1,6</sup>, Thomas T. Warner<sup>1,2,7</sup>, Jonathan Mill<sup>3</sup>, Conceição Bettencourt<sup>1,6\*</sup>**

<sup>1</sup>Queen Square Brain Bank, UCL Queen Square Institute of Neurology, University College London, UK

<sup>2</sup>Department of Clinical and Movement Neurosciences, UCL Queen Square Institute of Neurology, London, UK.

<sup>3</sup>University of Exeter Medical School, University of Exeter, UK

<sup>4</sup>Department of Neuropathology, Institute of Brain Science, Hirosaki University Graduate School of Medicine, Hirosaki, Japan.

<sup>5</sup>UCL Institute of Prion Diseases, MRC Prion Unit at UCL, University College London, London, UK.

<sup>6</sup>Department of Neurodegenerative Disease, UCL Queen Square Institute of Neurology, London, UK.

<sup>7</sup>Reta Lila Weston Institute, UCL Queen Square Institute of Neurology, London, UK.

## **\*Corresponding Author:**

Conceição Bettencourt, PhD

Department of Clinical and Movement Neurosciences

UCL Queen Square Institute of Neurology

Queen Square Brain Bank for Neurological Disorders

1 Wakefield Street

London WC1N 1PJ

United Kingdom

Email: c.bettencourt@ucl.ac.uk

## Supplementary Information

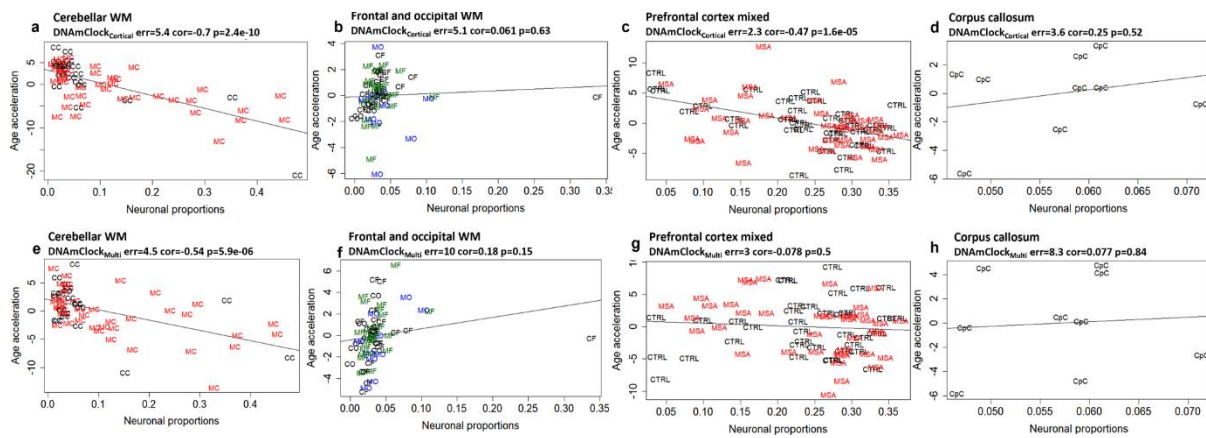

**Figure S1. Association between age acceleration and neuronal proportions for DNAmClock<sub>Cortical</sub> and DNAmClock<sub>Multi</sub> in the different brain regions. (a-d)** Age acceleration residuals (y-axis) versus neuronal proportions (x-axis) for DNAmClock<sub>Cortical</sub> and **(e-h)** Age acceleration residuals (y-axis) versus neuronal proportions (x-axis) for DNAmClock<sub>Multi</sub> in the different brain regions. Age acceleration residuals were obtained by regressing DNA methylation age against confounding factors, including chronological age; neuronal proportions were obtained using a DNA methylation-based cell-type deconvolution algorithm. The correlation coefficient and p-values shown were calculated using Pearson correlation. CC – control cerebellum (WM); MC – multiple system atrophy (MSA) cerebellum (WM); CF – control frontal lobe (WM); MF – MSA frontal lobe (WM); CO – control occipital lobe (WM); MO – MSA occipital lobe (WM); PFC – prefrontal cortex (GM+WM), CpC – Corpus callosum; WM – white matter; GM – grey matter.

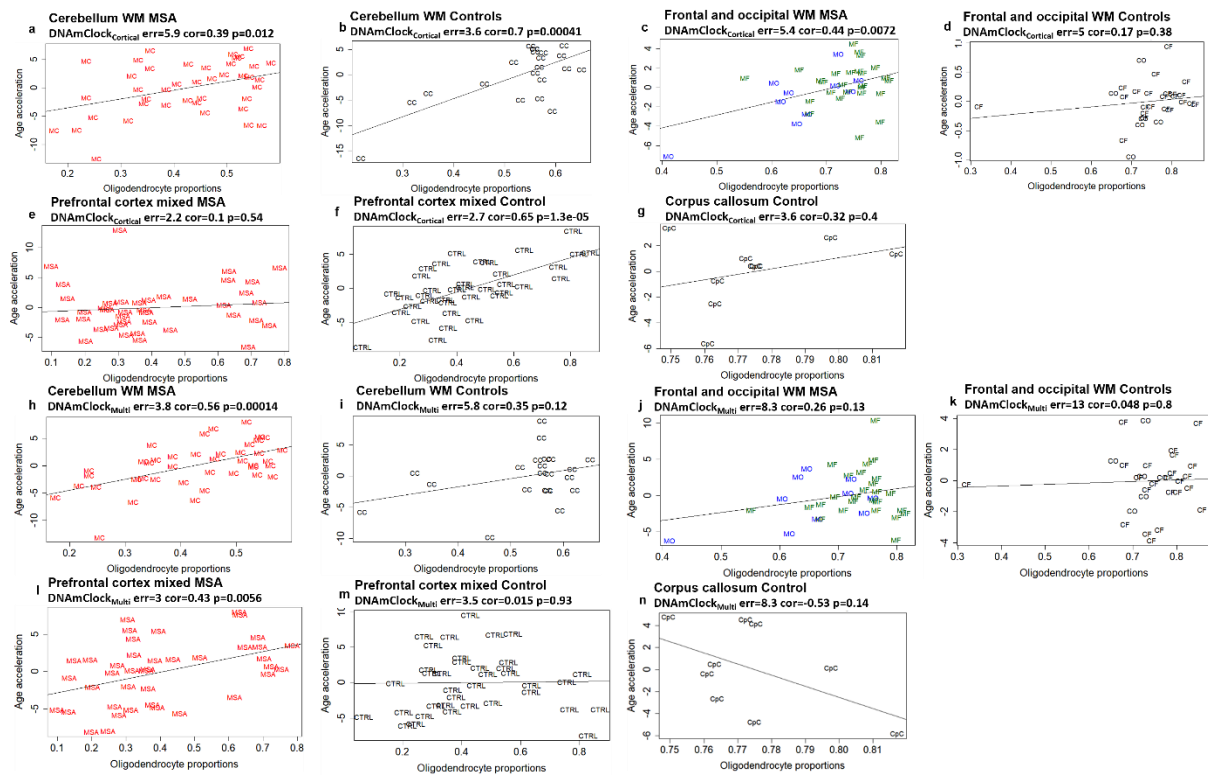

**Figure S2. Association between age acceleration and oligodendrocyte proportions for the multiple system atrophy (MSA) cases and control groups for DNAmClock<sub>Cortical</sub> and DNAmClock<sub>Multi</sub> in the different brain regions (a-g) Age acceleration residuals (y-axis) versus oligodendrocyte (SOX10+) proportions (x-axis) for the DNAmClock<sub>Cortical</sub> and (h-n) Age acceleration residuals (y-axis) versus oligodendrocyte (SOX10+) proportions (x-axis) for the DNAmClock<sub>Multi</sub> in the different brain regions. Age acceleration residuals were obtained by regressing DNA methylation age against confounding factors, including chronological age; oligodendrocyte proportions were obtained using a DNA methylation-based cell-type deconvolution algorithm. The correlation coefficient and p-values shown were calculated using Pearson correlation. CC – control cerebellum (WM); MC – MSA cerebellum (WM); CF – control frontal lobe (WM); MF – MSA frontal lobe (WM); CO – control occipital lobe (WM); MO – MSA occipital lobe (WM); PFC - prefrontal cortex (GM+WM); CpC – Corpus callosum; WM – white matter; GM – grey matter.**

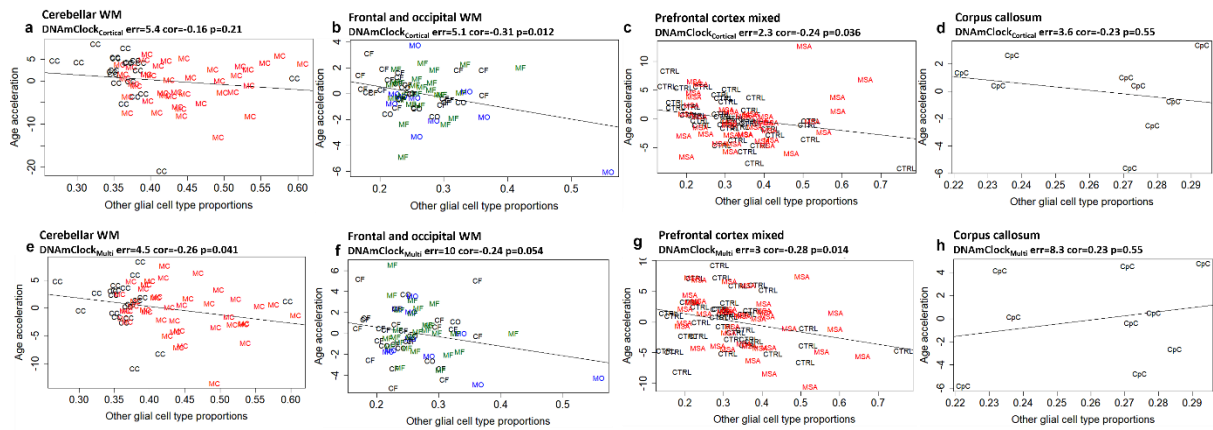

**Figure S3. Association between age acceleration and other glial cell type (NeuN-/SOX10-) populations for DNAmClock<sub>Cortical</sub> and DNAmClock<sub>Multi</sub> clocks in the different brain regions. (a-d)** Age acceleration residuals (y-axis) versus other brain cell type (NeuN-/SOX10-) proportions (x-axis) for the DNAmClock<sub>Cortical</sub> and **(e-h)** Age acceleration residuals (y-axis) versus other brain cell type (NeuN-/SOX10-) proportions (x-axis) for the DNAmClock<sub>Multi</sub> in the different brain regions. Age acceleration residuals were obtained by regressing DNA methylation age against confounding factors, including chronological age; NeuN-/SOX10- proportions were obtained using a DNA methylation-based cell-type deconvolution algorithm. The correlation coefficient and p-values shown were calculated using Pearson correlation. CC – control cerebellum (WM); MC – multiple system atrophy (MSA) cerebellum (WM); CF – control frontal lobe (WM); MF – MSA frontal lobe (WM); CO – control occipital lobe (WM); MO – MSA occipital lobe (WM); PFC - prefrontal cortex (GM+WM), CpC – Corpus callosum; WM – white matter; GM – grey matter.

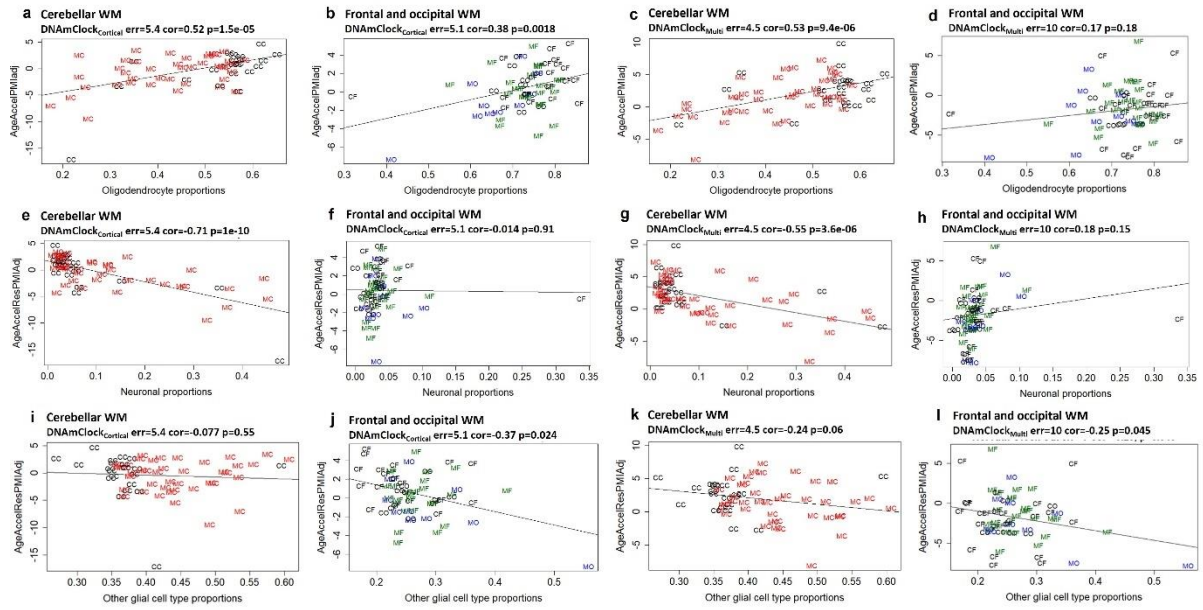

**Figure S4. Association between age acceleration and the different cell type proportions for DNAmClock<sub>Cortical</sub> and DNAmClock<sub>Multi</sub> in the different brain regions after including post-mortem interval (PMI) as a covariate in cohort 1 regression models. (a-d) Age acceleration residuals (y-axis) versus oligodendrocyte (NeuN-/SOX10+) proportions (x-axis) for both clocks; (e-h) age acceleration residuals (y-axis) versus neuronal (NeuN+/SOX10-) proportions (x-axis) for both clocks; (i-l) age acceleration residuals (y-axis) versus other glial cell type (NeuN-/SOX10-) proportions (x-axis) for both clocks. Age acceleration residuals were obtained by regressing DNA methylation age against confounding factors, including chronological age; cell proportions were obtained using a DNA methylation-based cell-type deconvolution algorithm. The correlation coefficient and p-values shown were calculated using Pearson correlation. CC – control cerebellum (WM); MC – multiple system atrophy (MSA) cerebellum (WM); CF – control frontal lobe (WM); MF – MSA frontal lobe (WM); CO – control occipital lobe (WM); MO – MSA occipital lobe (WM); WM – white matter.**

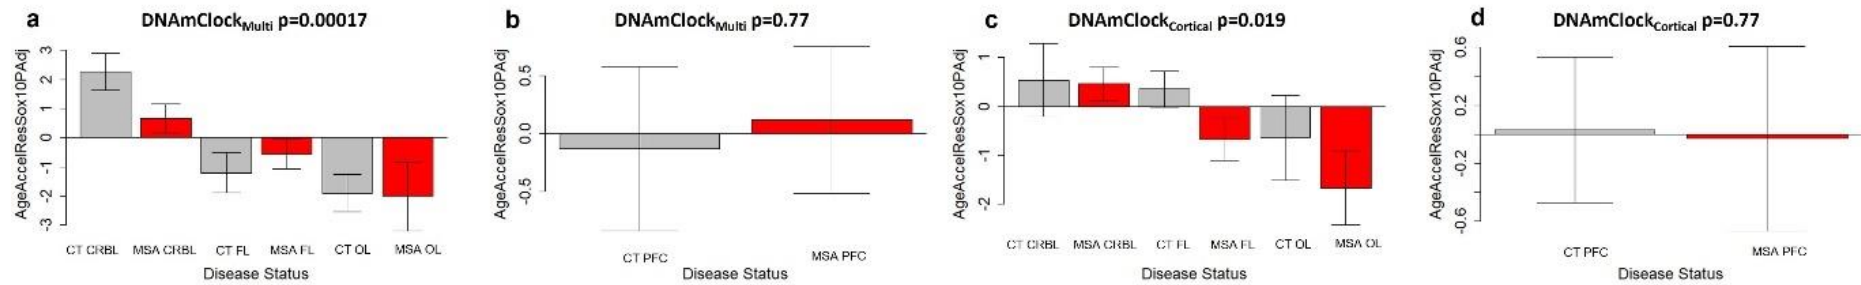

**Figure S5. Age acceleration estimation after adjusting for oligodendrocyte proportions for DNAmClock<sub>Cortical</sub> and DNAmClock<sub>Multi</sub> in the different brain regions (a-d)** Acceleration residual after adjusting for chronological age and oligodendrocyte proportions for the DNAmClock<sub>Multi</sub> (a - cohort 1; b - cohort 2) and DNAmClock<sub>Cortical</sub> (c - cohort 1; d - cohort 2) in the different brain regions. The p-values for across group comparisons were calculated using the Kruskal-Wallis test and p-values for pairwise analysis between MSA and controls for each brain region were calculated using the Wilcoxon's test with Benjamini-Hochberg correction for multiple testing. CT CRBL – control cerebellum (WM); MSA CRBL – multiple system atrophy (MSA) cerebellum (WM); CT FL – control frontal lobe (WM); MSA FL – MSA frontal lobe (WM); CT OL – control occipital lobe (WM); MSA OL – MSA occipital lobe (WM); CT PFC – control prefrontal cortex (GM+WM); MSA PFC – MSA prefrontal cortex (GM+WM); WM – white matter; GM – grey matter.

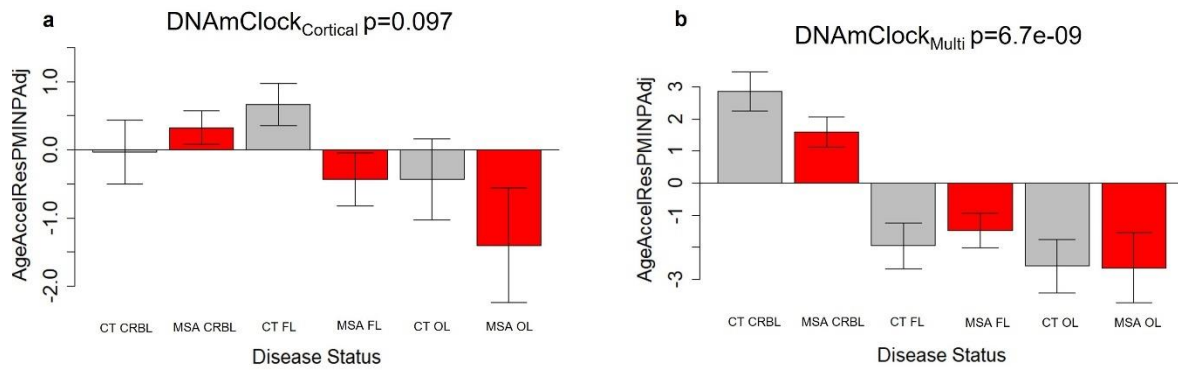

**Figure S6. Age acceleration estimation for cohort 1 in the different brain regions for (a) DNAmClock<sub>Cortical</sub> and (b) DNAmClock<sub>Multi</sub> after adjusting for post-mortem interval (PMI)** (Chronological age, neuronal proportions, replicate individuals and PMI were included in the regression model). CT CRBL - control cerebellum (WM); MSA CRBL – multiple system atrophy (MSA) cerebellum (WM); CT FL – control frontal lobe (WM); MSA FL – MSA frontal lobe (WM); CT OL – control occipital lobe (WM); MSA OL – MSA occipital lobe (WM); CT PFC – control prefrontal cortex (GM+WM); MSA PFC – MSA prefrontal cortex (GM+WM); WM – white matter; GM – grey matter. The p-values for across group comparisons were calculated using the Kruskal-Wallis test and p-values for pairwise analysis between MSA and controls for each brain region were calculated using the Wilcoxon’s test with Benjamini-Hochberg correction for multiple testing.

**Table S1.** Cohort demographics.

| Tissue/Region             | Controls       |                |              |                               |          | MSA            |                |              |                               |         |
|---------------------------|----------------|----------------|--------------|-------------------------------|----------|----------------|----------------|--------------|-------------------------------|---------|
|                           | No. of samples |                |              | Mean Chronological age<br>±SD |          | No. of samples |                |              | Mean Chronological age<br>±SD |         |
|                           | N              | Females<br>(%) | Males<br>(%) | Females                       | Males    | N              | Females<br>(%) | Males<br>(%) | Females                       | Males   |
| <b>Cohort 1</b>           |                |                |              |                               |          |                |                |              |                               |         |
| Cerebellum (WM)           | 21             | 47.6           | 52.4         | 81.1±9                        | 79.55±9  | 41             | 48.8           | 51.2         | 64.2±7                        | 64.48±8 |
| Frontal lobe (WM)         | 23             | 47.8           | 52.2         | 76±10                         | 76.58±7  | 26             | 50             | 50           | 65.85±4                       | 67.08±8 |
| Occipital lobe (WM)       | 6              | 33.3           | 66.7         | 95±5                          | 83.75±8  | 10             | 50             | 50           | 64.6±3                        | 63.4±8  |
| <b>Cohort 2</b>           |                |                |              |                               |          |                |                |              |                               |         |
| Prefrontal cortex (GM+WM) | 37             | 48.6           | 51.4         | 72.78±9                       | 73.16±11 | 40             | 56.1           | 41.5         | 64.91±5                       | 67.47±6 |
| <b>Cohort 3</b>           |                |                |              |                               |          |                |                |              |                               |         |
| Corpus callosum           | 9              | 22.2           | 77.8         | 58±9                          | 61.43±13 | -              | -              | -            | -                             | -       |
| <b>Cohort 4</b>           |                |                |              |                               |          |                |                |              |                               |         |
| Sox10+ nuclei             | 15             | 53.3           | 46.7         | 77.88±12                      | 81.86±8  | -              | -              | -            | -                             | -       |

MSA - multiple system atrophy; WM - white matter; GM+WM - Mix of grey and white matter; SD - Standard deviation



**Table S2.** Difference in median absolute deviation between controls and MSA for DNAmClock<sub>Multi</sub> and DNAmClock<sub>Cortical</sub>.

| Region                    | DNAmClock <sub>Cortical</sub> |     |                        | DNAmClock <sub>Multi</sub> |     |                        |
|---------------------------|-------------------------------|-----|------------------------|----------------------------|-----|------------------------|
|                           | CTRL                          | MSA | p value<br>(two.sided) | CTRL                       | MSA | p value<br>(two.sided) |
| <b>Cohort 1</b>           |                               |     |                        |                            |     |                        |
| Cerebellum (WM)           | 3.6                           | 5.9 | 0.158                  | 5.8                        | 3.8 | 0.014                  |
| Frontal lobe (WM)         | 5.1                           | 5.4 | 0.912                  | 12                         | 8.3 | 0.016                  |
| Occipital lobe (WM)       | 2.6                           | 5.3 | 0.626                  | 16                         | 8.7 | 0.008                  |
| <b>Cohort 2</b>           |                               |     |                        |                            |     |                        |
| Prefrontal cortex (GM+WM) | 2.7                           | 3.5 | 0.614                  | 2.2                        | 3   | 0.795                  |
| <b>Total</b>              |                               |     | <b>0.222</b>           |                            |     | <b>0.011</b>           |

CTRL - control; MSA - multiple system atrophy; WM - white matter; GM+WM - Mix of grey and white matter; the p-values were calculated using two-sided Wilcoxon rank sum test with continuity correction.

**Table S3.** Mean chronological and DNAm ages for DNAmClock<sub>Multi</sub> and DNAmClock<sub>Cortical</sub> for all brain regions of control and MSA samples.

| Tissue/Region             | N    |     | Mean chronological age |       | Mean DNAm age                 |       |                            |       |
|---------------------------|------|-----|------------------------|-------|-------------------------------|-------|----------------------------|-------|
|                           | CTRL | MSA | CTRL                   | MSA   | DNAmClock <sub>Cortical</sub> |       | DNAmClock <sub>Multi</sub> |       |
|                           |      |     |                        |       | CTRL                          | MSA   | CTRL                       | MSA   |
| <b>Cohort 1</b>           |      |     |                        |       |                               |       |                            |       |
| Cerebellum (WM)           | 21   | 41  | 80.28                  | 64.34 | 81.1                          | 68.9  | 72.53                      | 60.26 |
| Frontal lobe (WM)         | 23   | 26  | 76.3                   | 66.46 | 80.3                          | 71.8  | 64.06                      | 58.3  |
| Occipital lobe (WM)       | 6    | 10  | 87.5                   | 64    | 84.2                          | 66.98 | 69.8                       | 54.9  |
| <b>Cohort 2</b>           |      |     |                        |       |                               |       |                            |       |
| Prefrontal cortex (GM+WM) | 37   | 41  | 72.97                  | 66    | 73.26                         | 66.66 | 71.27                      | 66.41 |
| <b>Cohort 3</b>           |      |     |                        |       |                               |       |                            |       |
| Corpus callosum           | 9    |     | 60.66                  |       | 57.03                         |       | 53.17                      |       |
| <b>Cohort 4</b>           |      |     |                        |       |                               |       |                            |       |
| SOX10+ nuclei             | 15   |     | 79.73                  |       | 90.11                         |       | 53.74                      |       |

CTRL - control; MSA - multiple system atrophy; WM - white matter; GM+WM - Mix of grey and white matter
